# Supplementary material
Source: PubMed Central journal article supplement (PMC8033777)
Supplement: pt1c00022_si_001.pdf [file pt1c00022_si_001.pdf]

# Supporting Information

## **Synergistic Inhibition of SARS-CoV-2 Replication using Disulfiram/Ebselen and Remdesivir**

Ting Chen<sup>1</sup>, Cheng-Yin Fei<sup>2</sup>, Yi-Ping Chen<sup>2</sup>, Karen Sargsyan<sup>1</sup>, Chun-Ping Chang<sup>3</sup>, Hanna S. Yuan<sup>2\*</sup>, and Carmay Lim<sup>1,4\*</sup>

*<sup>1</sup>Institute of Biomedical Sciences, Academia Sinica, Taipei 115, Taiwan*

*<sup>2</sup>Institute of Molecular Biology, Academia Sinica, Taipei 115, Taiwan*

*<sup>3</sup>Institute of Biotechnology and Pharmaceutical Research, National Health Research Institutes, Miaoli 350, Taiwan*

*<sup>4</sup>Department of Chemistry, National Tsing Hua University, Hsinchu 300, Taiwan*

Corresponding author's e-mail: [carmay@gate.sinica.edu.tw](mailto:carmay@gate.sinica.edu.tw) or [hanna@sinica.edu.tw](mailto:hanna@sinica.edu.tw)

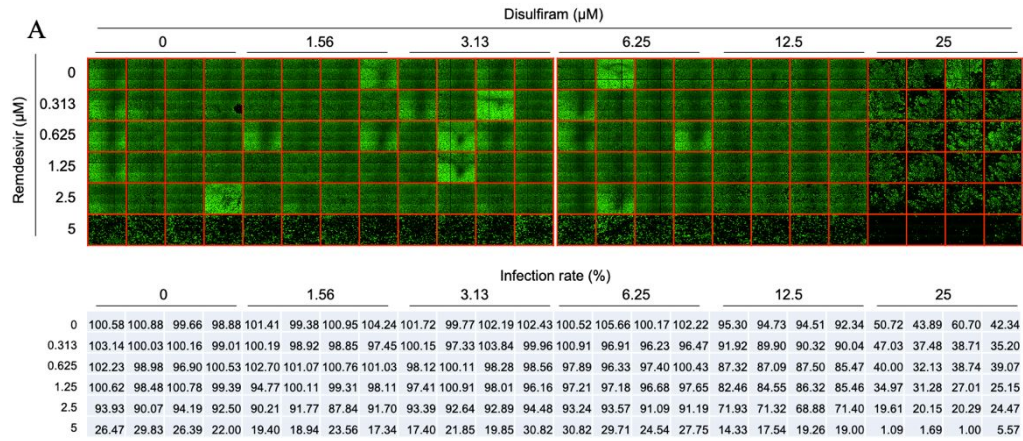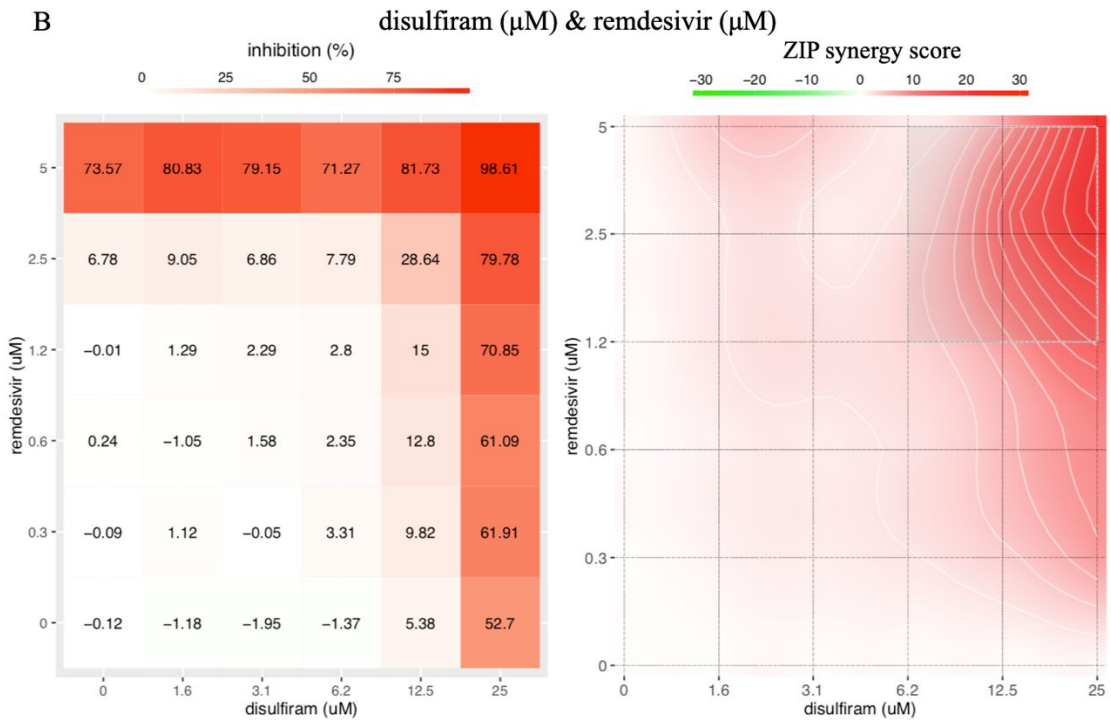

**Supplementary Figure S1. Synergistic antiviral potential of disulfiram and remdesivir.** (A) A low-dosing window of synergistic antiviral effect in Vero E6 cells treated with remdesivir and disulfiram was determined. The fluorescent signal was quantified by high-content imaging analysis system (Molecular Devices) and the infection rate of no compound treatment was set as 100%. To detect SARS-CoV-2, the cells were stained with anti-SARS-CoV-2 N protein antibody and anti-human IgG-488 (shown in green). (B) The corresponding dose-based synergy scores of remdesivir and disulfiram was plotted by SynergyFinder.

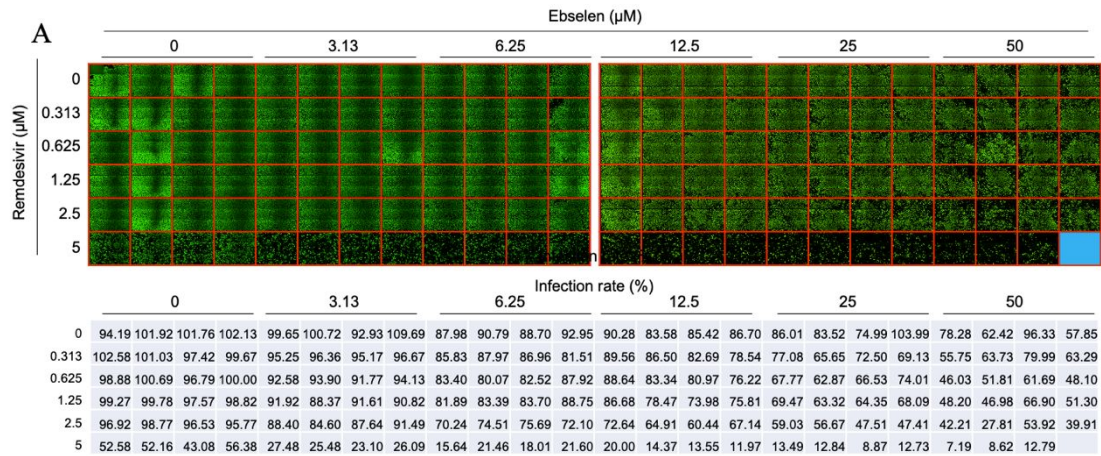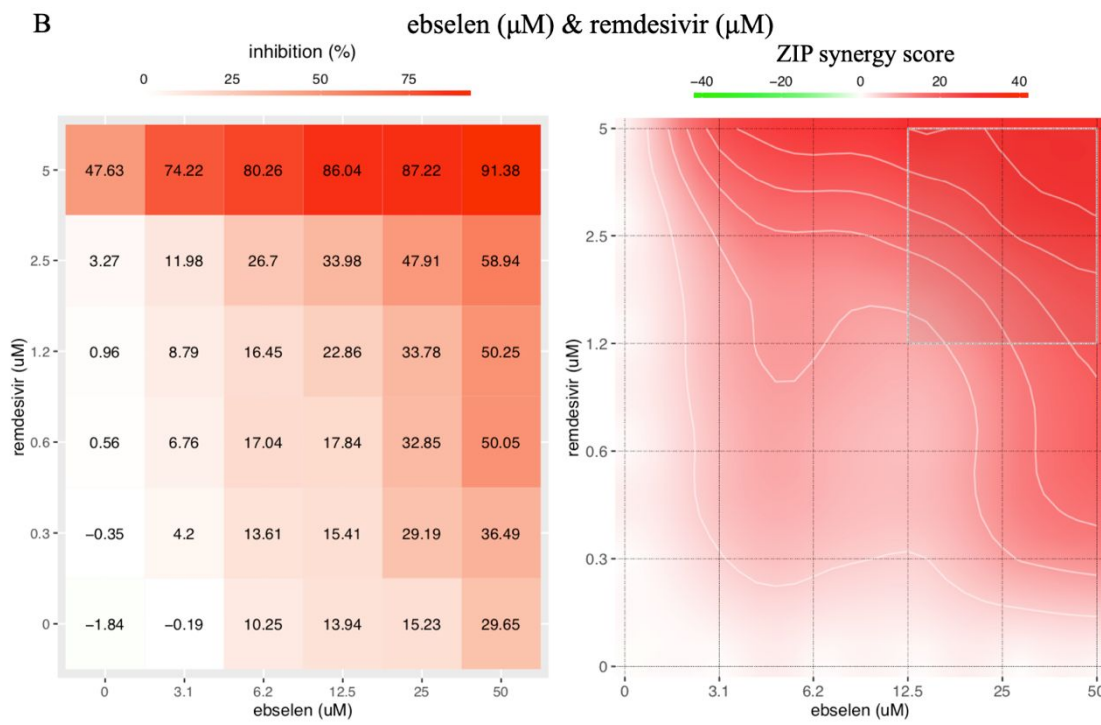

**Supplementary Figure S2. Synergistic antiviral potential of ebselen and remdesivir.** (A) A low-dosing window of synergistic antiviral effect in Vero E6 cells treated with remdesivir and ebselen was determined. The fluorescent signal was quantified by high-content imaging analysis system (Molecular Devices) and the infection rate of no compound treatment was set as 100%. To detect SARS-CoV-2, the cells were stained with anti-SARS-CoV-2 N protein antibody and anti-human IgG-488 (shown in green). (B) The corresponding dose-based synergy scores of remdesivir and ebselen was plotted by SynergyFinder.
